# Supplementary material for: Ultrafast charge-transfer in organic photovoltaic interfaces: geometrical and functionalization effects
Source: Royal Society of Chemistry journal article supplement (doi:10.1039/c6nr02857h), 2016-01-01
Supplement: c6nr02857h1.pdf [file c6nr02857h1.pdf]

**Supporting Information**  
**Photoexcited Charge-Transfer Separation at Donor-Acceptor**  
**Organic Interfaces: Molecular Configuration and Surface**  
**Functionalization Effects**

Elton J. G. Santos\*

*Department of Chemical Engineering,  
Stanford University, Stanford, California 94305, USA  
School of Mathematics and Physics,  
Queen's University Belfast, BT7 1NN, United Kingdom and  
School of Chemistry and Chemical Engineering,  
Queen's University Belfast, BT9 5AL, United Kingdom*

W. L. Wang

*School of Engineering and Applied Sciences,  
Harvard University, Cambridge, Massachusetts 02138, USA*

PACS numbers:

# I. DENSITY FUNCTIONAL HYBRID CALCULATIONS FOR C<sub>60</sub> AND ZNPC INTERFACES

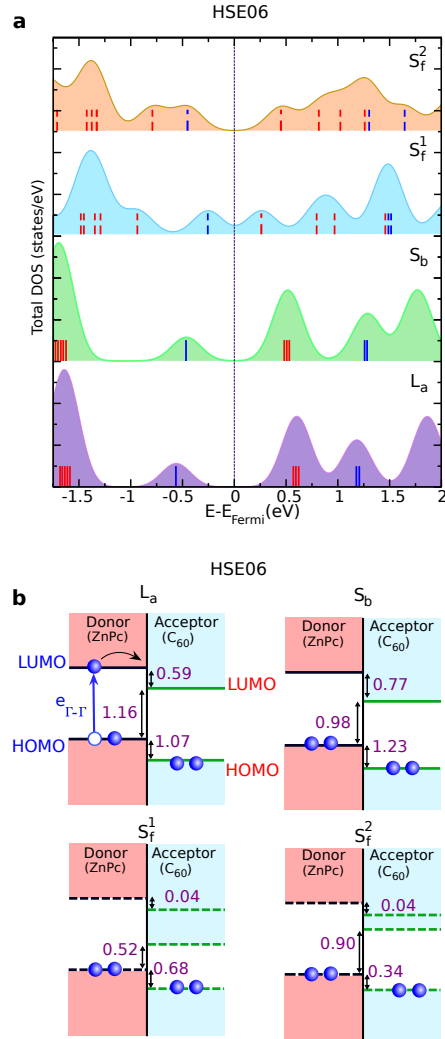

FIG. 1S: Hybrid HSE06 calculations for  $L_a$ ,  $S_b$ ,  $S_f^1$  and  $S_f^2$  configurations. **a**, Calculated total density of states (states/eV) as a function of energy (eV). For clarity, curves have been shifted and smoothed with a Lorentzian broadening of 0.200 eV. The major contributions of each molecule, that is C<sub>60</sub> and ZnPc, on each interface around the Fermi level is marked by the vertical bars in blue and red colors. The Fermi level is set to zero. **b**, Energy level diagrams (eV) showing the main states involved in the photo-excitation dynamics at the Donor (ZnPc) and Acceptor (C<sub>60</sub>) heterointerfaces similarly to Figure 1 in the main text.

---

\* Electronic address: [e.santos@qub.ac.uk](mailto:e.santos@qub.ac.uk)
